# Supplementary material for: A second dose of kisspeptin-54 improves oocyte maturation in women at high risk of ovarian hyperstimulation syndrome: a Phase 2 randomized controlled trial
Source: PubMed Central journal article supplement (PMC5850304; doi:10.1093/humrep/dex253), 2017-08-08
Supplement: dex253supplementalfigures1.pdf [file dex253supplementalfigures1.pdf]

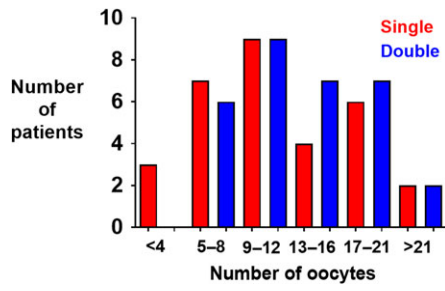

**Supplemental Figure S1** Histogram of number of oocytes retrieved by kisspeptin dosing group. Frequency of patients by categories of number of oocytes retrieved is presented for kisspeptin dosing groups: Number of patients receiving a single dose of kisspeptin is shown in red bars ( $n = 31$ ) and number of patients receiving two doses of kisspeptin (double) shown in blue bars ( $n = 31$ ).
