# Supplementary material for: A second dose of kisspeptin-54 improves oocyte maturation in women at high risk of ovarian hyperstimulation syndrome: a Phase 2 randomized controlled trial
Source: PubMed Central journal article supplement (PMC5850304; doi:10.1093/humrep/dex253), 2017-08-08
Supplement: dex253supplementarytablesi.pdf [file dex253supplementarytablesi.pdf]

**Supplementary Table SI Reproductive hormone levels in patients receiving one or two injections of kisspeptin-54.**

| Time point                                               | LH (iU/L)   |             | P value | FSH (iU/L) |            | P value | Estradiol (pmol/L) |               | Progesterone (nmol/L) |            |
|----------------------------------------------------------|-------------|-------------|---------|------------|------------|---------|--------------------|---------------|-----------------------|------------|
|                                                          | Single      | Double      |         | Single     | Double     |         | Single             | Double        | Single                | Double     |
| Pre-first KP injection                                   | 3.1 (3.7)   | 2.3 (1.4)   |         | 7.9 (3.3)  | 8.1 (2.5)  |         | 14 085 (8042)      | 12 402 (6456) | 4.7 (6.9)             | 3.6 (4.4)  |
| Four hours post first KP injection                       | 45.2 (30.4) | 52.2 (26.6) |         | 9.6 (3.3)  | 10.6 (2.9) |         | 16 272 (8651)      | 14 302 (7119) | 9.7 (9.7)             | 8.6 (5.7)  |
| Ten hours post first KP injection (pre second injection) | 17.7 (11.1) | 19.2 (8.9)  |         | 9.9 (3.6)  | 10.9 (2.8) |         | 16 364 (9144)      | 13 809 (6482) | 18.0 (15.1)           | 15.9 (8.0) |
| Four hours post second KP injection                      | 5.5 (3.8)   | 23.5 (24.9) | 0.0002  | 8.8 (3.2)  | 10.8 (2.6) | 0.01    | 14 502 (7146)      | 12 880 (6148) | 22.9 (16.8)           | 22.8 (9.3) |
| Ten hours post second KP injection                       | 2.6 (1.8)   | 5.5 (5.4)   |         | 7.2 (2.6)  | 8.6 (2.2)  |         | 11 982 (5922)      | 10 927 (5972) | 19.5 (13.4)           | 22.3 (9.8) |

Mean (SD) reproductive hormone levels (serum LH in iU/L, serum FSH in iU/L, serum estradiol in pmol/L, serum progesterone in nmol/L) in patients receiving either a single injection of kisspeptin-54 9.6 nmol/kg (Single,  $n = 31$ ), or two injections of kisspeptin-54 at 9.6 nmol/kg at a 10 h interval (Double,  $n = 31$ ) to trigger oocyte maturation. A two way unpaired  $t$ -test was used to compare absolute serum LH levels, and absolute serum FSH levels at 4 h following the second injection (saline in Single group, or kisspeptin-54 at 9.6 nmol/kg in Double group) between the two groups (secondary analysis).

## References

Abbara A, Jayasena CN, Christopoulos G, Narayanaswamy S, Izzi-Engbeaya C, Nijher GMK, Comninou AN, Peters D, Buckley A, Ratnasabapathy R et al. Efficacy of kisspeptin-54 to trigger oocyte maturation in women at high risk of ovarian hyperstimulation syndrome (OHSS) during in vitro fertilization (IVF) therapy. *J Clin Endocrinol Metab* 2015; **100**:3322–3331.

Golan A, Ron-El R, Herman A, Soffer Y, Weinraub Z, Caspi E. Ovarian hyperstimulation syndrome: an update review. *Obstet Gynecol Surv* 1989; **44**:430–440.

Navot D, Bergh PA, Laufer N. Ovarian hyperstimulation syndrome in novel reproductive technologies: prevention and treatment. *Fertil Steril* 1992; **58**:249–261.
