# Supplementary material for: A second dose of kisspeptin-54 improves oocyte maturation in women at high risk of ovarian hyperstimulation syndrome: a Phase 2 randomized controlled trial
Source: PubMed Central journal article supplement (PMC5850304; doi:10.1093/humrep/dex253), 2017-08-08
Supplement: dex253supplementarytablesii.pdf [file dex253supplementarytablesii.pdf]

**Supplementary Table SII Ovarian hyperstimulation syndrome (OHSS) in high risk women following kisspeptin-54 trigger.**

| OHSS screening<br>Kisspeptin dosing group                               | Early OHSS  |             |             | AD (CI) P value                  | Late OHSS   |             |             | AD (CI) P value                  |
|-------------------------------------------------------------------------|-------------|-------------|-------------|----------------------------------|-------------|-------------|-------------|----------------------------------|
|                                                                         | Single      | Double      | All         |                                  | Single      | Double      | All         |                                  |
| <i>Number of patients diagnosed with OHSS*</i>                          |             |             |             |                                  |             |             |             |                                  |
| Normal                                                                  | 30 (96.8%)  | 31 (100%)   | 61 (98.4%)  |                                  | 31 (100%)   | 30 (96.8%)  | 61 (98.4%)  |                                  |
| Mild                                                                    | 0           | 0           | 0           |                                  | 0           | 1 (3.2%)    | 1 (1.6%)    |                                  |
| Moderate                                                                | 1 (3.2%)    | 0           | 1 (1.6%)    |                                  | 0           | 0           | 0           |                                  |
| Severe                                                                  | 0           | 0           | 0           |                                  | 0           | 0           | 0           |                                  |
| Critical                                                                | 0           | 0           | 0           |                                  | 0           | 0           | 0           |                                  |
| <i>OHSS symptoms</i>                                                    |             |             |             |                                  |             |             |             |                                  |
| Number of patients screened by OHSS symptoms (%)                        | 31 (100%)   | 31 (100%)   | 62 (100%)   |                                  | 31 (100%)   | 31 (100%)   | 62 (100%)   |                                  |
| Number of patients with ≥1 symptom potentially consistent with OHSS (%) | 9 (29.0%)   | 7 (22.6%)   | 16 (25.8%)  |                                  | 9 (29.0%)   | 9 (29.0%)   | 18 (29.0%)  |                                  |
| Number of patients requiring medical intervention for OHSS (%)          | 0 (0.0%)    | 0 (0.0%)    | 0 (0.0%)    |                                  | 0 (0.0%)    | 0 (0.0%)    | 0 (0.0%)    |                                  |
| Number of patients requiring hospitalization for OHSS (%)               | 1 (3.2%)    | 0 (0.0%)    | 1 (1.6%)    |                                  | 0 (0.0%)    | 0 (0.0%)    | 0 (0.0%)    |                                  |
| <i>Sonographic screening</i>                                            |             |             |             |                                  |             |             |             |                                  |
| Number of patients screened with pelvic ultrasound (%)                  | 31 (100%)   | 30 (96.8%)  | 61 (98.4%)  |                                  | 30 (96.8%)  | 31 (100%)   | 61 (98.4%)  |                                  |
| Mean ovarian volume in ml (SD)                                          | 68.6 (52.1) | 48.2 (28.9) | 58.6 (43.2) | -20.4 (-39.3, -1.5)<br>P = 0.034 | 28.9 (40.9) | 16.1 (15.9) | 22.4 (31.3) | -12.8 (-22.5, -3.3)<br>P = 0.006 |
| Mean ovarian diameter in mm (SD)                                        | 41.5 (10.1) | 38.7 (7.9)  | 40.2 (9.1)  |                                  | 29.6 (9.9)  | 25.9 (6.0)  | 27.8 (8.3)  |                                  |
| Maximal ovarian diameter in mm (SD)                                     | 64.2 (15.1) | 58.1 (11.0) | 61.3 (13.6) | -6.1 (-12.9, 0.60)<br>P = 0.079  | 44.7 (14.0) | 42.4 (9.5)  | 43.5 (11.9) | -2.3 (-7.7, 3.1)<br>P = 0.410    |
| Number of patients with maximum ovarian diameter ≥5 cm (%)              | 24 (77.4%)  | 22 (73.3%)  | 46 (75.4%)  |                                  | 7 (23.3%)   | 7 (22.6%)   | 14 (23.0%)  |                                  |
| Number of patients with maximum ovarian diameter ≥8 cm (%)              | 5 (16.1%)   | 1 (3.3%)    | 6 (9.8%)    |                                  | 1 (3.3%)    | 0 (0.0%)    | 1 (1.6%)    |                                  |
| Number of patients with maximum ovarian diameter ≥12 cm (%)             | 0 (0.0%)    | 0 (0.0%)    | 0 (0.0%)    |                                  | 0 (0.0%)    | 0 (0.0%)    | 0 (0.0%)    |                                  |
| Total free fluid in abdomen, POD/Adnexa in ml (SD)                      | 5.8 (8.1)   | 3.4 (5.8)   | 4.6 (7.1)   |                                  | 3.0 (11.8)  | 0.8 (2.3)   | 1.9 (8.4)   |                                  |
| Number of patients with ≥ Grade 2 ascites (%)                           | 0 (0.0%)    | 0 (0.0%)    | 0 (0.0%)    |                                  | 0 (0.0%)    | 0 (0.0%)    | 0 (0.0%)    |                                  |
| Number of patients with pleural effusion (%)                            | 0 (0.0%)    | 0 (0.0%)    | 0 (0.0%)    |                                  | 0 (0.0%)    | 0 (0.0%)    | 0 (0.0%)    |                                  |
| <i>Blood parameters</i>                                                 |             |             |             |                                  |             |             |             |                                  |
| Number of patients screened with Blood analysis (%)                     | 31 (100%)   | 29 (93.5%)  | 60 (96.8%)  |                                  | 30 (96.8%)  | 31 (100%)   | 61 (98.4%)  |                                  |
| Number of patients with haematocrit >45% (%)                            | 0 (0.0%)    | 0 (0.0%)    | 0 (0.0%)    |                                  | 0 (0.0%)    | 0 (0.0%)    | 0 (0.0%)    |                                  |
| Number of patients with serum sodium ≥132 mmol/L (%)                    | 0 (0.0%)    | 0 (0.0%)    | 0 (0.0%)    |                                  | 0 (0.0%)    | 0 (0.0%)    | 0 (0.0%)    |                                  |
| Number of patients with serum potassium ≥5.0 mmol/L (%)                 | 0 (0.0%)    | 0 (0.0%)    | 0 (0.0%)    |                                  | 0 (0.0%)    | 0 (0.0%)    | 0 (0.0%)    |                                  |
| Number of patients with ALT ≥2 × ULN (%)                                | 3 (9.7%)    | 1 (3.4%)    | 4 (6.7%)    |                                  | 1 (3.3%)    | 1 (3.2%)    | 2 (3.4%)    |                                  |

Continued

**Supplementary Table SII** *Continued*

| <b>OHSS screening</b>                                        | <b>Early OHSS</b> |               |            |                        | <b>Late OHSS</b> |               |            |                        |
|--------------------------------------------------------------|-------------------|---------------|------------|------------------------|------------------|---------------|------------|------------------------|
|                                                              | <b>Single</b>     | <b>Double</b> | <b>All</b> | <b>AD (CI) P value</b> | <b>Single</b>    | <b>Double</b> | <b>All</b> | <b>AD (CI) P value</b> |
| <b>Kisspeptin dosing group</b>                               |                   |               |            |                        |                  |               |            |                        |
| Number of patients with AST $\geq 2 \times$ ULN (%)          | 2 (6.5%)          | 1 (3.4%)      | 3 (5.0%)   |                        | 0 (0.0%)         | 0 (0.0%)      | 0 (0.0%)   |                        |
| Number of patients with total protein $\geq 80$ g/L (%)      | 1 (3.2%)          | 0 (0.0%)      | 1 (1.7%)   |                        | 0 (0.0%)         | 0 (0.0%)      | 0 (0.0%)   |                        |
| Number of patient with creatinine $\geq 110$ $\mu$ mol/L (%) | 0 (0.0%)          | 0 (0.0%)      | 0 (0.0%)   |                        | 1 (3.3%)         | 0 (0.0%)      | 1 (1.6%)   |                        |

Mean (SD) is presented for continuous variables and number of patients (%) for categorical variables.

\*Diagnosis of OHSS was performed by two experienced IVF physicians (R.S. and S.L.) independent of the study team provided with blinded data according to the criteria of Golan *et al.* (1989) with updated categorization of severe and critical OHSS by Navot *et al.* (1992).

AD, absolute difference; CI, confidence interval; POD, pouch of douglas; ALT, alanine transaminase; AST, aspartate transaminase; ULN, upper limit of normal.

## Reference

Navot D, Bergh PA, Laufer N. Ovarian hyperstimulation syndrome in novel reproductive technologies: prevention and treatment. *Fertil Steril* 1992;**58**:249–261.
